# Supplementary material for: Construction of three high-dimensional supramolecular networks from temperature-driven conformational isomers
Source: Royal Society of Chemistry journal article supplement (doi:10.1039/c0ce00485e), 2010-11-01

## Supporting Information

### **Construction of three high-dimensional supramolecular networks from temperature-driven conformational isomers†**

Hua-Cai Fang, Ying-Ying Ge, Hong-Yang Jia, Shan-Shan Li, Feng Sun,  
Li-Guo Zhang, and Yue-Peng Cai\*

School of Chemistry and Environment, Key Lab of Technology on Electrochemical Energy Storage and Power Generation in Guangdong Universities, Engineering Research Center of Materials and Technology for Electrochemical Energy Storage (Ministry of Education), South China Normal University Guangzhou, 510006, China

---

\* Corresponding Author E-mail: [ypcai8@yahoo.com](mailto:ypcai8@yahoo.com)

**Materials and physical measurements:** All reagents were commercially available and used without further purification. Infrared spectra were obtained from KBr pellets on a Bruker TENSOR 27 Fourier transformation infrared spectrometer in the 400-4000  $\text{cm}^{-1}$  region. Elemental analyses (C, H, N) were performed on a Perkin-Elmer 240 elemental analyzer. Powder X-ray diffraction (PXRD) data were recorded on a Rigaku D/M-2200T automated diffractometer. The luminescent spectra for the solid state were recorded at room temperature on an Aminco Bowman Series 2 spectrofluorometer with a xenon arc lamp as the light source. In the measurements of emission and excitation spectra the pass width is 5.0 nm.

**Table S1** Distances ( $\text{\AA}$ ) and angles ( $^\circ$ ) of hydrogen bonds for the compounds **1-3**.

| D-H...A                      | d(H...A) | d(D...A) | $\angle$ D-H...A |
|------------------------------|----------|----------|------------------|
| <b><math>\alpha</math>-1</b> |          |          |                  |
| C(2)-H(2)...N(6)#1           | 2.654(6) | 3.457(5) | 145(2)           |
| C(3)-H(3)...N(6)#1           | 2.717(5) | 3.530(5) | 167(2)           |
| C(6)-H(6)...N(4)#2           | 2.695(5) | 3.528(5) | 150(2)           |
| C(2)-H(2)...N(6)#3           | 2.654(6) | 3.457(6) | 145(3)           |
| C(7)-H(7A)...N(6)#4          | 2.699(5) | 3.502(5) | 141(2)           |
| $\pi \cdots \pi$             | 3.606(5) |          |                  |
| <b><math>\beta</math>-2</b>  |          |          |                  |
| C(3)-H(3)...N(9)#4           | 2.588(4) | 3.460(4) | 156(2)           |
| C(6)-H(6) ...N(6)#4          | 2.612(4) | 3.456(5) | 151(2)           |
| C(7)-H(7A) ...N(6)#5         | 2.739(3) | 3.584(4) | 146(2)           |
| C(8)-H(8B) ...N(9)#6         | 2.623(4) | 3.546(4) | 159(2)           |
| C(9)-H(9B)... $\pi$          | 3.178(4) |          |                  |
| <b><math>\gamma</math>-3</b> |          |          |                  |
| C(3)-H(3)...N(6)#7           | 2.704(5) | 3.390(5) | 131(2)           |
| C(2)-H(2)...N(6)#7           | 2.700(5) | 3,329(5) | 126(2)           |
| C(10)-H(10)... $\pi$         | 3.052(5) |          |                  |

\*Symmetry transformation used to generate equivalent atoms: #1  $x, 1+y, z$ ; #2  $1+x, y, z$ ; #3  $x, y-1, z+1$ ; #4  $x, y, 1+z$ ; #5  $1+x, y, 1+z$ ; #6  $1-x, -y, -z$ ; #7  $x, 1+y, 1+z$ .

Scheme S1. Several symmetrical-and unsymmetrical Schiff base ligands involved in text.

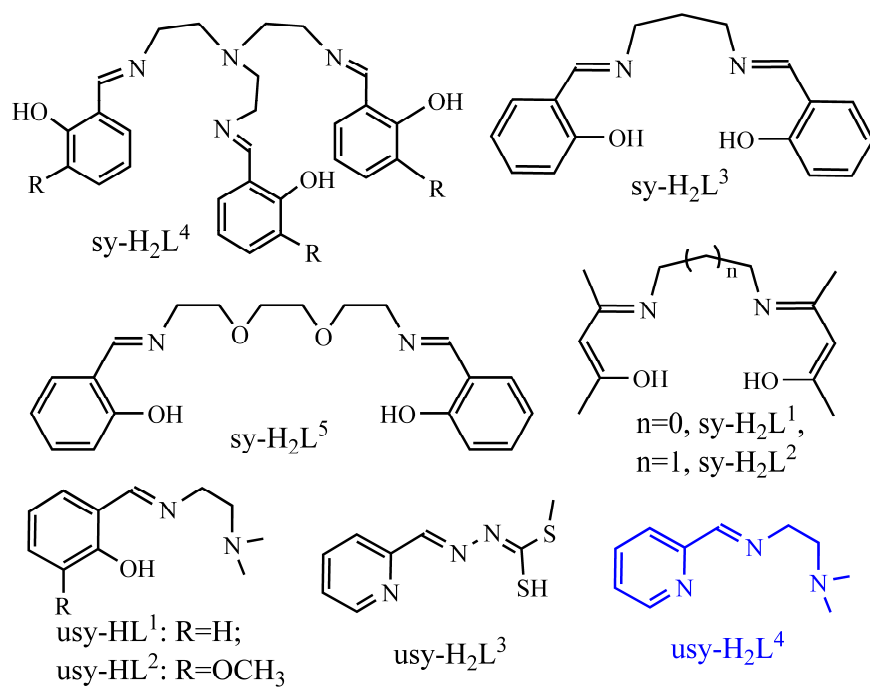

**Figure S1** Molecular structure of isomer  $\beta$ -2 with the atom numbers. The selected bond distances Zn1-N1 2.226(3), Zn1-N2 2.067(3), Zn1-N3 2.274(4), Zn1-N4 1.977(4), Zn1-N7 1.985(4) Å.

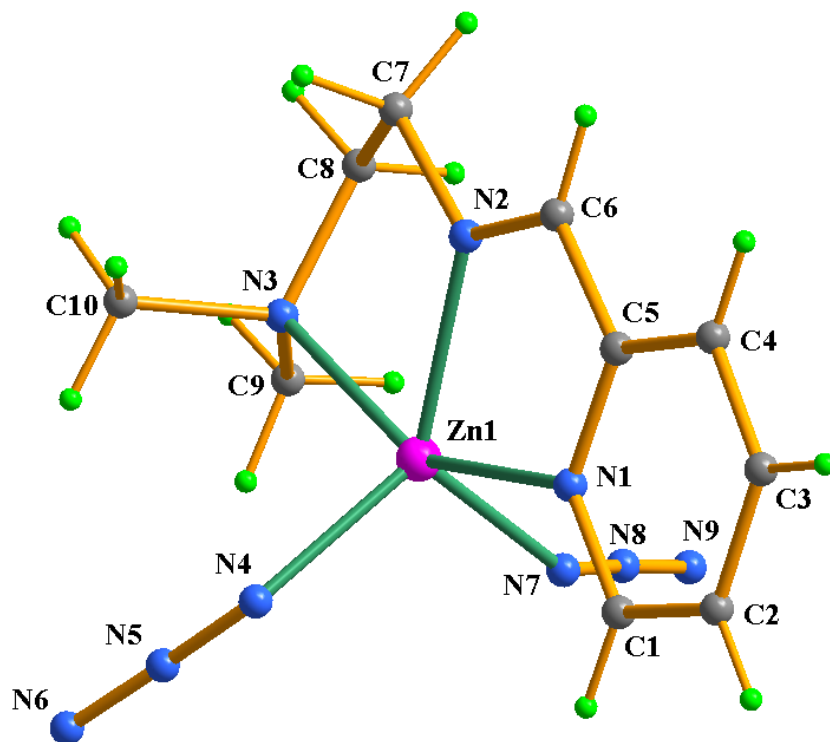

**Figure S2** Molecular structure of isomer  $\gamma$ -3 with the atom numbers. The selected bond distances Zn1-N1 2.236(3), Zn1-N2 2.067(4), Zn1-N3 2.261(4), Zn1-N4 2.011(4), Zn1-N7 1.976(4) Å.

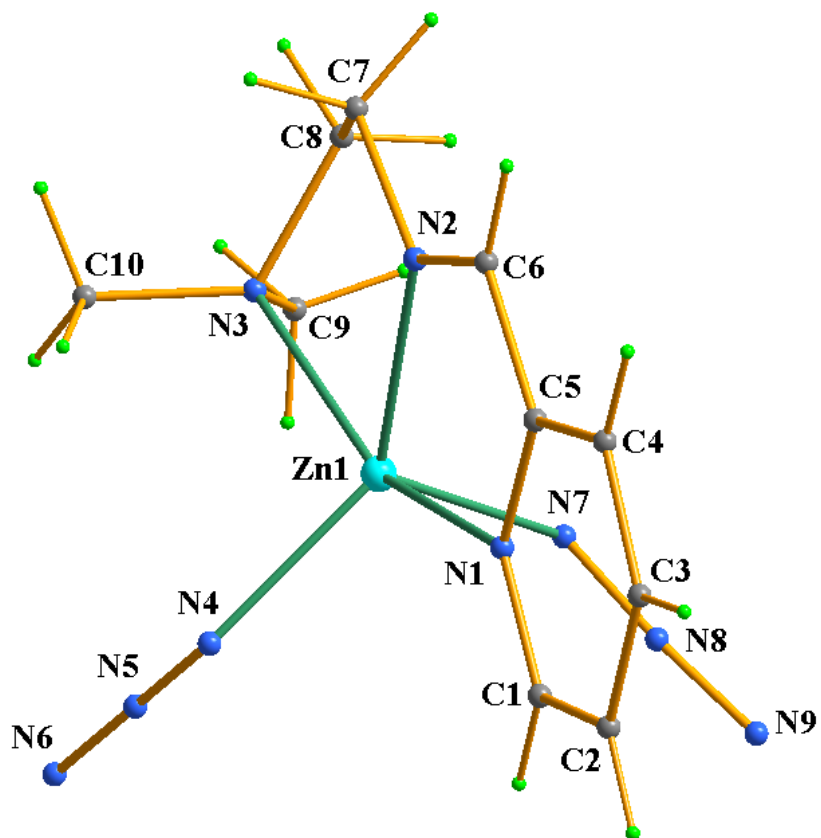

**Figure S3** 2-D supramolecular layer through hydrogen bonding C-H...N and  $\pi\cdots\pi$  packing interactions in compound **1** along *c* axis direction.

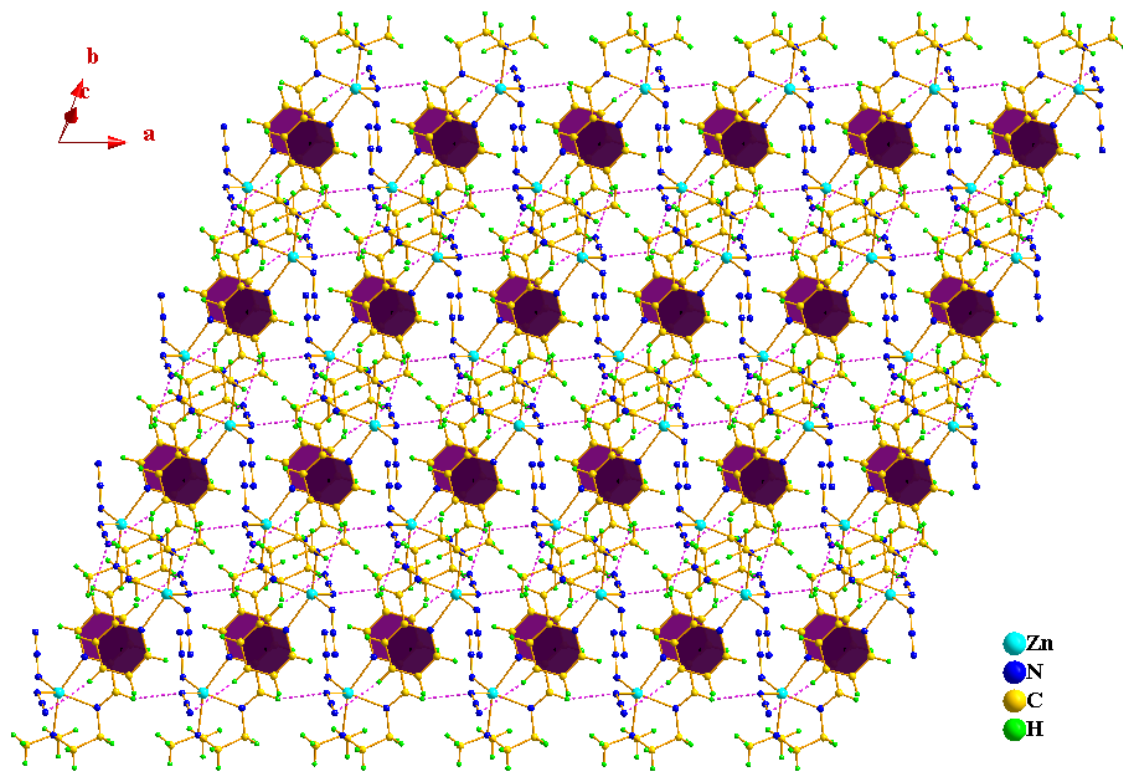

**Figure S4** 3-D supramolecular layer constructed through hydrogen bonding C-H...N interactions in compound **2** along *c* axis direction.

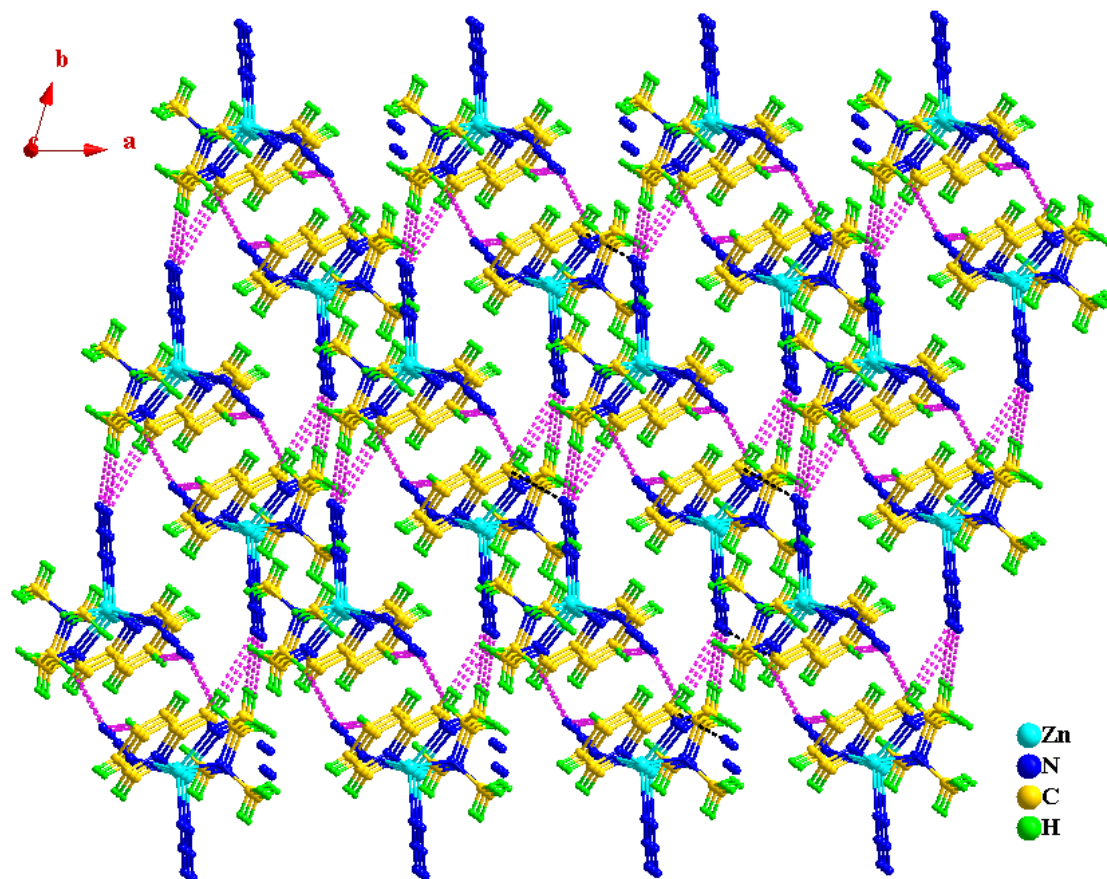

**Figure S5** 3-D supramolecular layer constructed through hydrogen bonding C-H $\cdots$ N and C-H $\cdots$  $\pi$  packing interactions in compound **3** along *b* axis direction.

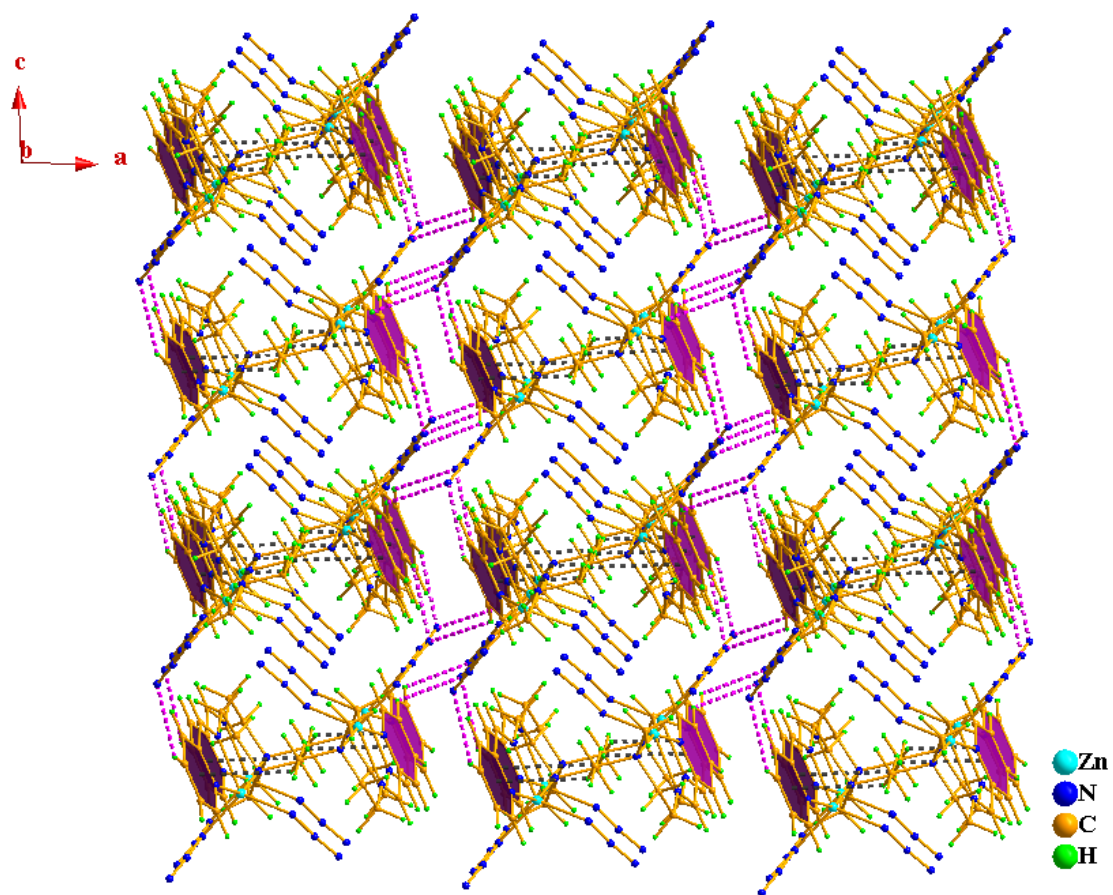



**Figure S6** PXRD patterns of three compounds **1-3** simulated from the X-ray single-crystal structure and as-synthesized samples.

**(1) for Compound 1**

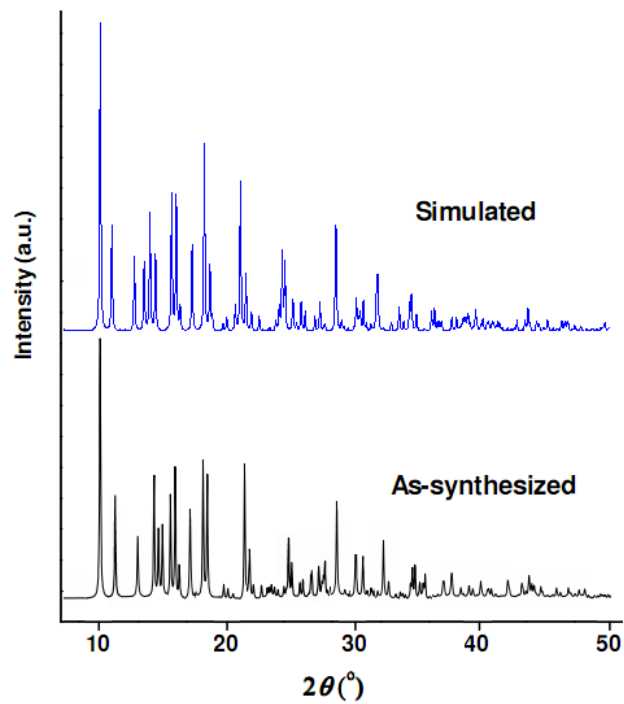

**(2) for Compound 2**

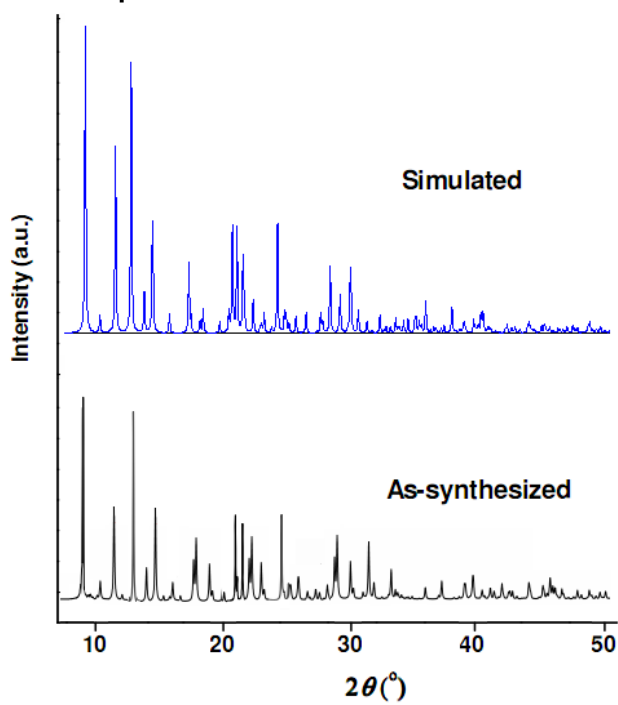

(3) for Compound 3

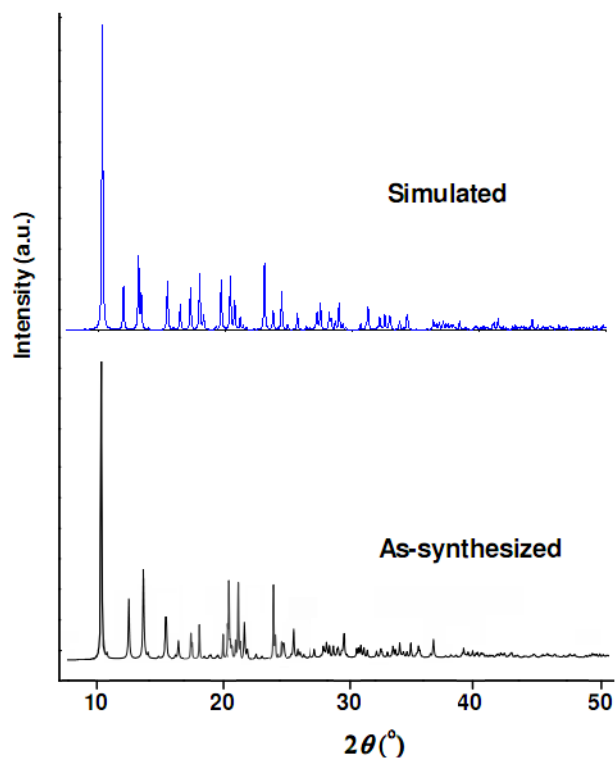

**Figure S7** Two DSC curves showing (a) the heating of **1** through to **3** and then (b) the cooling of **3** through **1**.

(a)

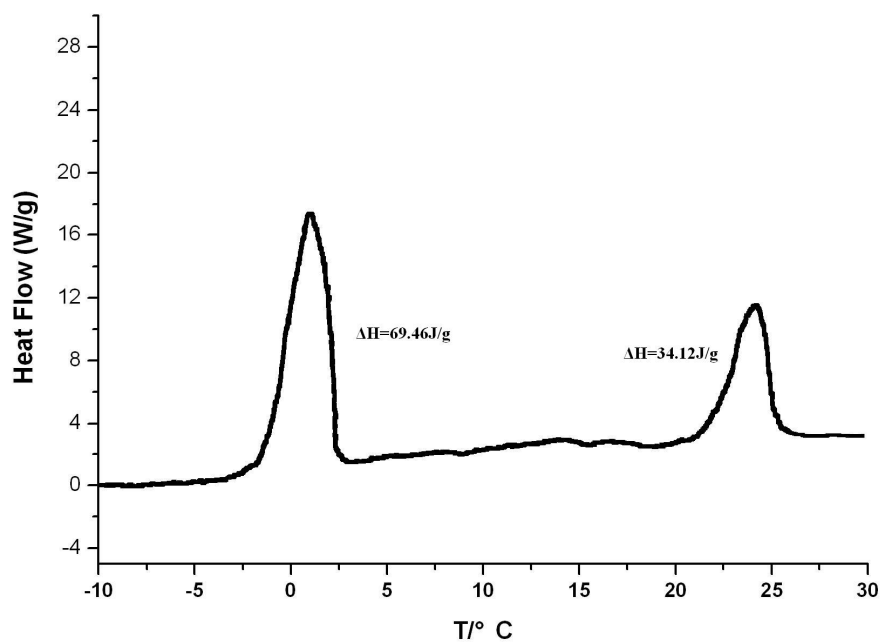

(b)

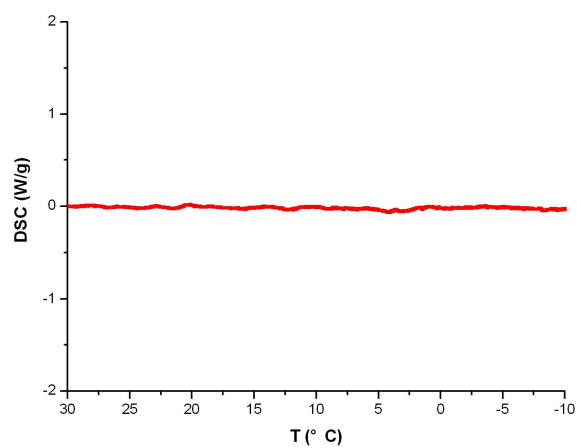

Supplement: c0ce00485e.pdf [file c0ce00485e.pdf]
